# Supplementary material for: Deep-sea mud in the Pacific Ocean as a potential resource for rare-earth elements
Source: Springer Nature journal article supplement (doi:10.1038/ngeo1185), 2011-07-03
Supplement: 41561_2011_BFngeo1185_MOESM301_ESM.pdf [file 41561_2011_BFngeo1185_MOESM301_ESM.pdf]

## Deep-sea mud in the Pacific Ocean as a potential resource for rare-earth elements

Yasuhiro Kato<sup>1\*</sup>, Koichiro Fujinaga<sup>1</sup>, Kentaro Nakamura<sup>2</sup>, Yutaro Takaya<sup>1</sup>, Kenichi Kitamura<sup>1</sup>, Junichiro Ohta<sup>1</sup>, Ryuichi Toda<sup>1</sup>, Takuya Nakashima<sup>1</sup> & Hikaru Iwamori<sup>3</sup>

<sup>1</sup> Department of Systems Innovation, The University of Tokyo, 7-3-1 Hongo, Bunkyo-ku, Tokyo 113-8656, Japan

<sup>2</sup> Precambrian Ecosystem Laboratory (PEL), Japan Agency for Marine-Earth Science and Technology (JAMSTEC), 2-15 Natsushima, Yokosuka, Kanagawa 237-0061, Japan

<sup>3</sup> Department of Earth and Planetary Sciences, Tokyo Institute of Technology, 2-12-1 Ookayama, Meguro-ku, Tokyo 152-8551, Japan

\*e-mail: [ykato@sys.t.u-tokyo.ac.jp](mailto:ykato@sys.t.u-tokyo.ac.jp)

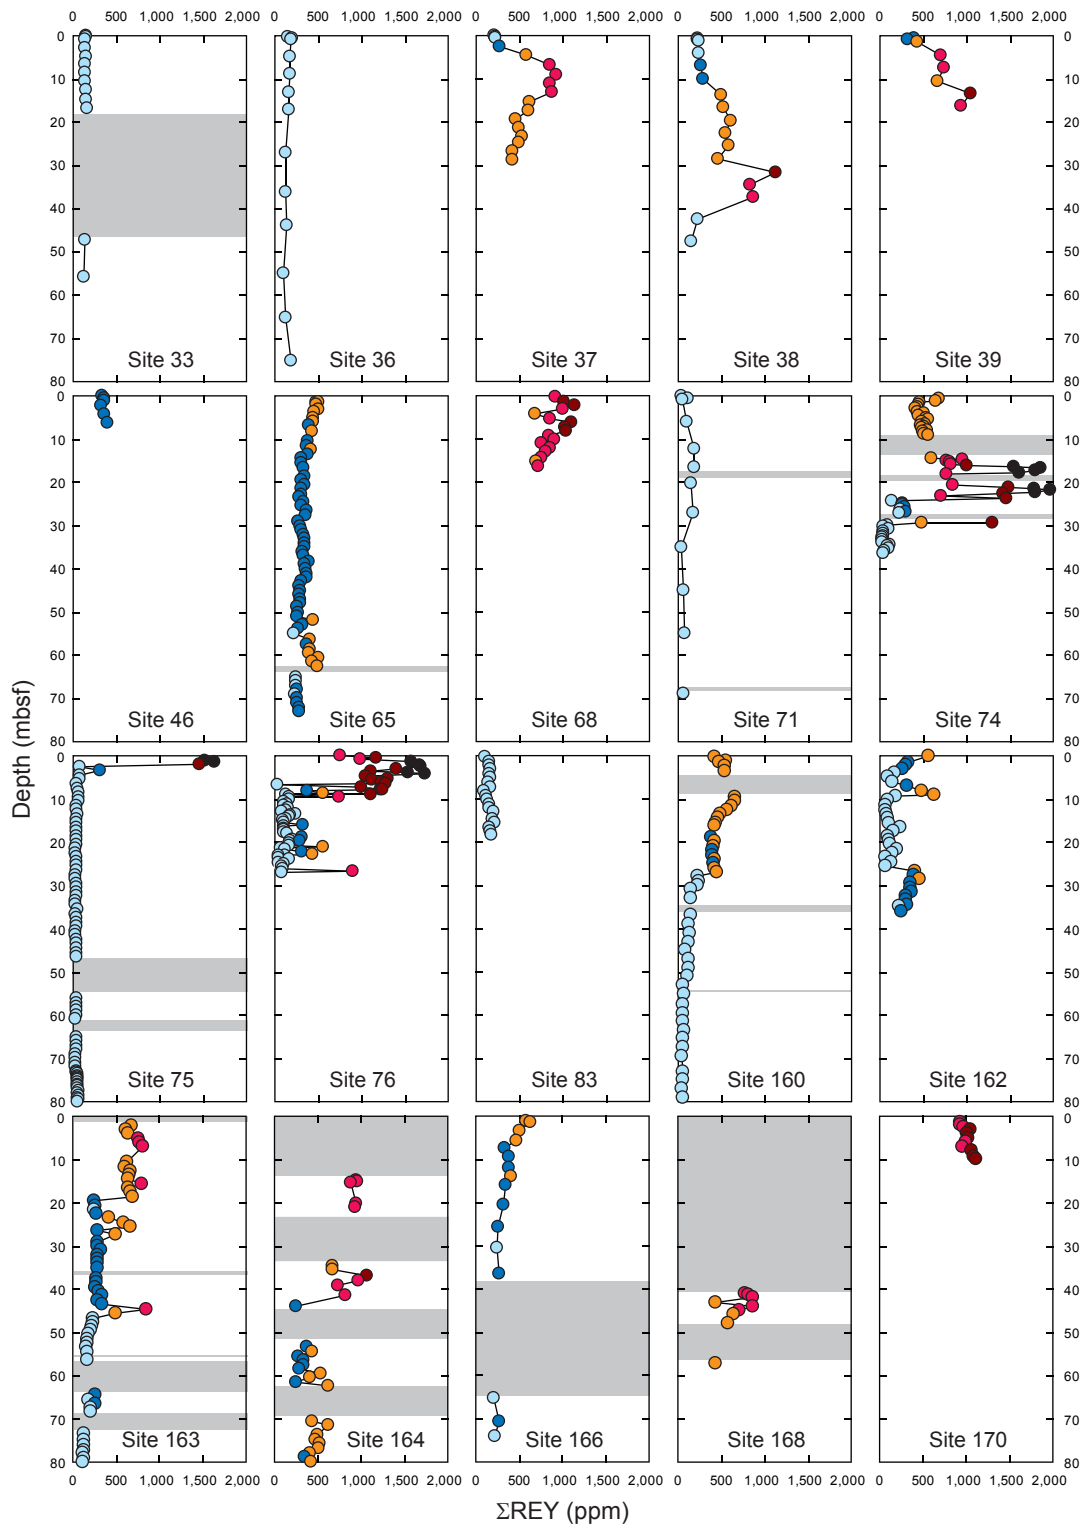

**Supplementary Figure S1. Detailed depth profiles of  $\Sigma$ REY contents for all study cores.**  
 The pale grey intervals represent no core recovery.

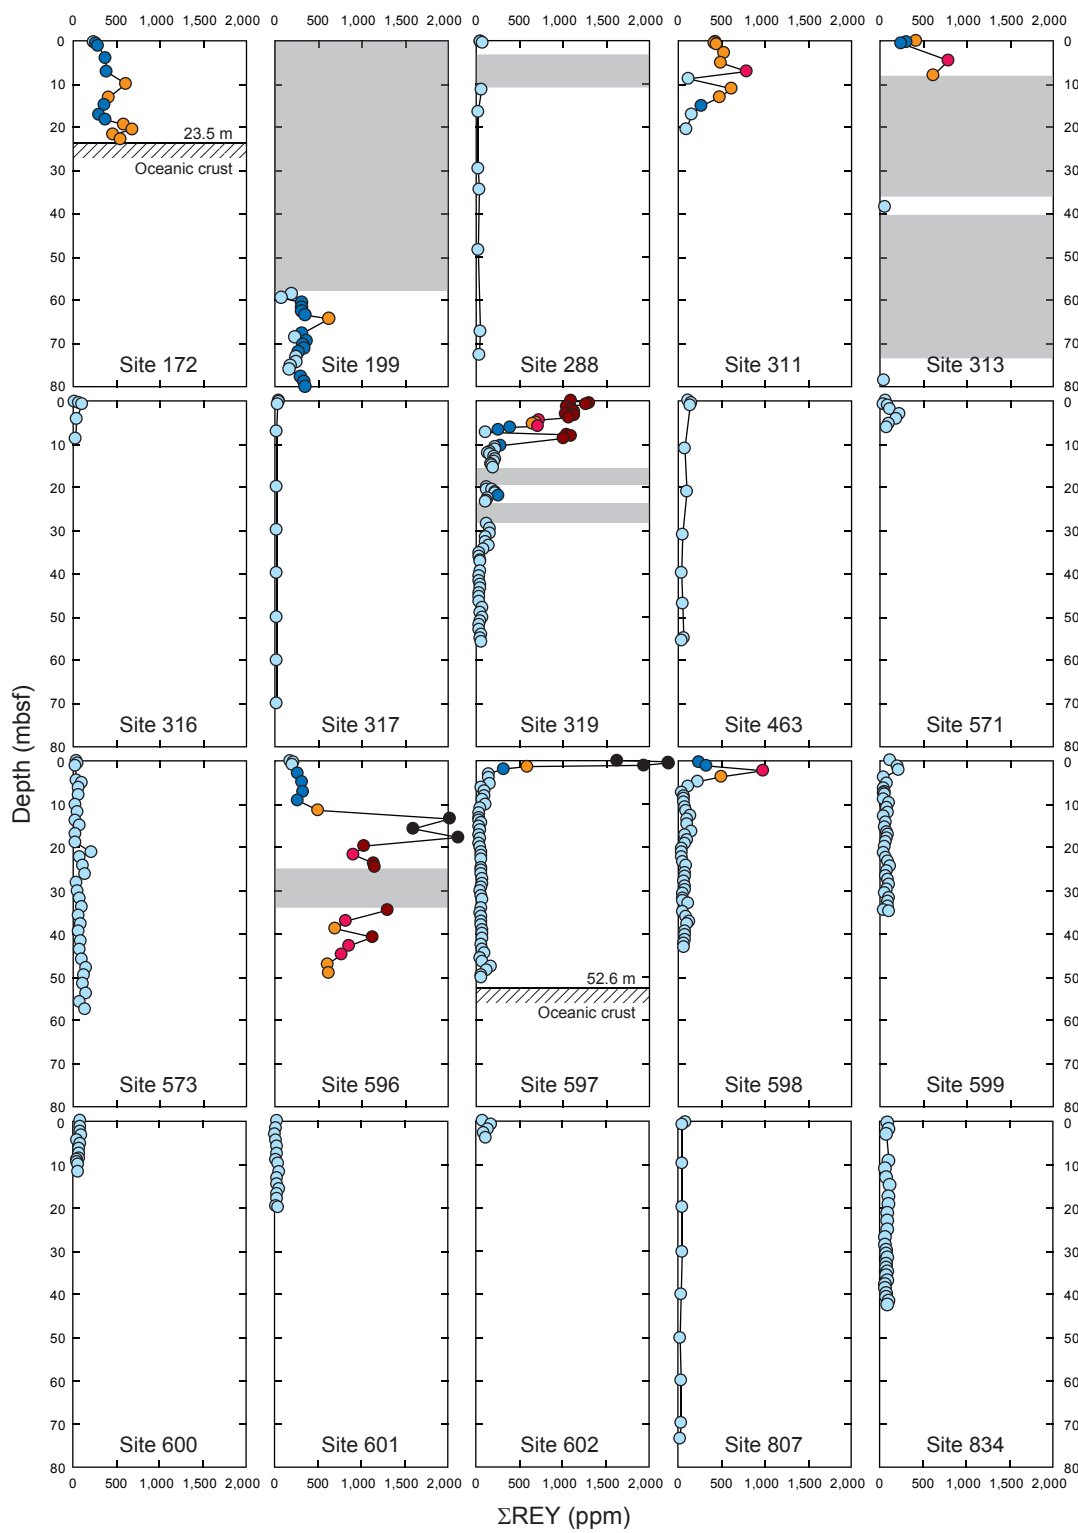

Supplementary Figure S1. (continued.)

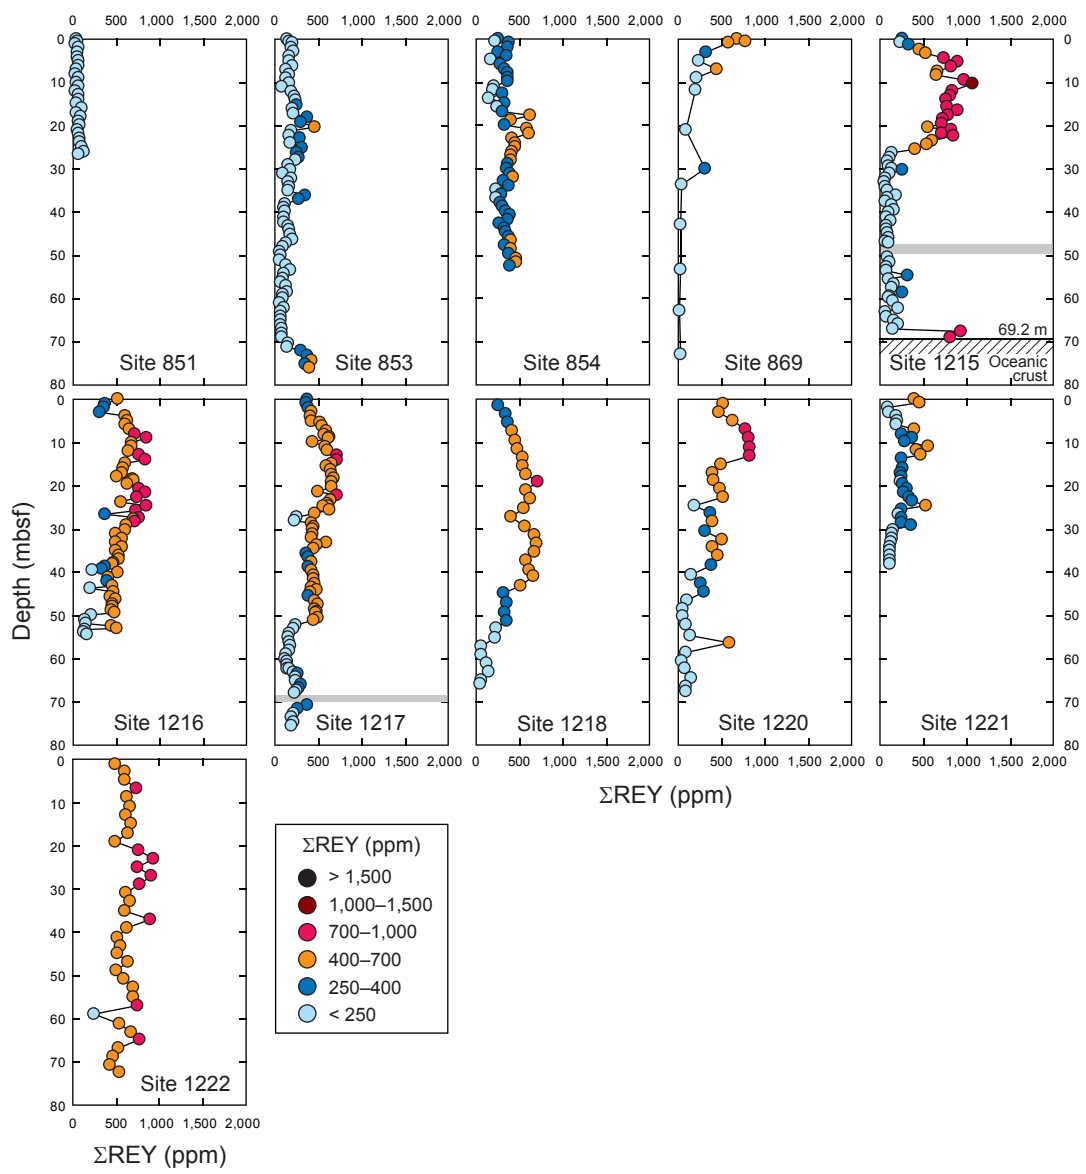

Supplementary Figure S1. (continued.)

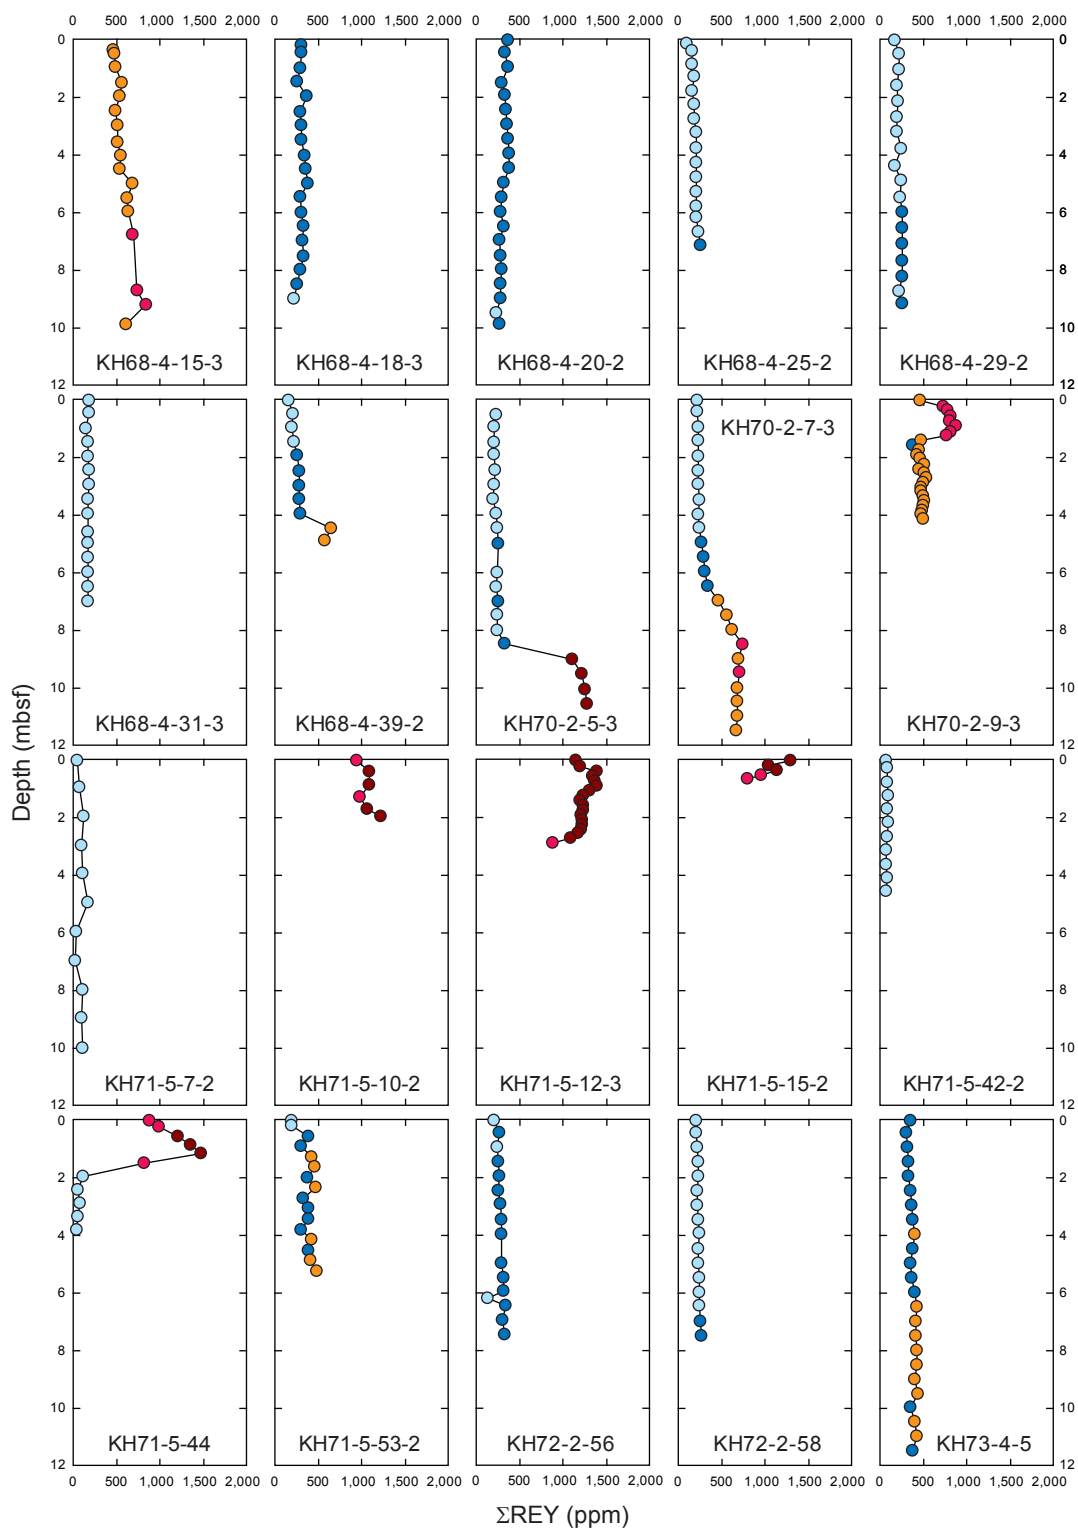

Supplementary Figure S1. (continued.)

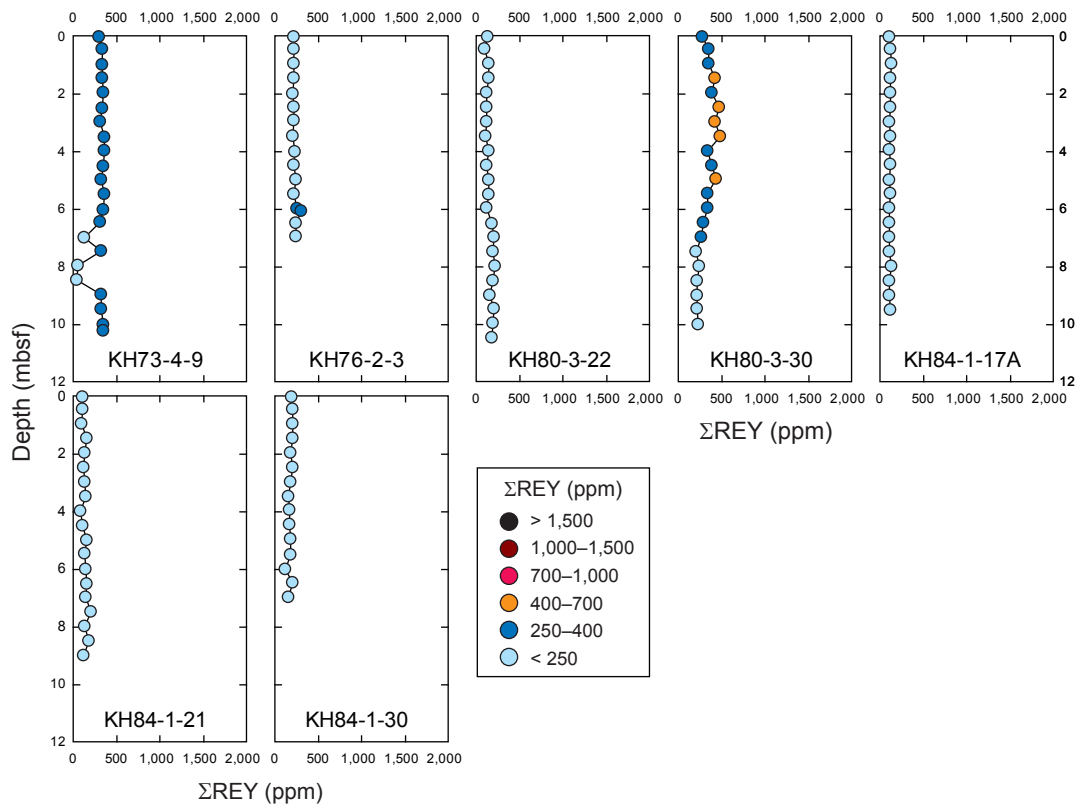

Supplementary Figure S1. (continued.)

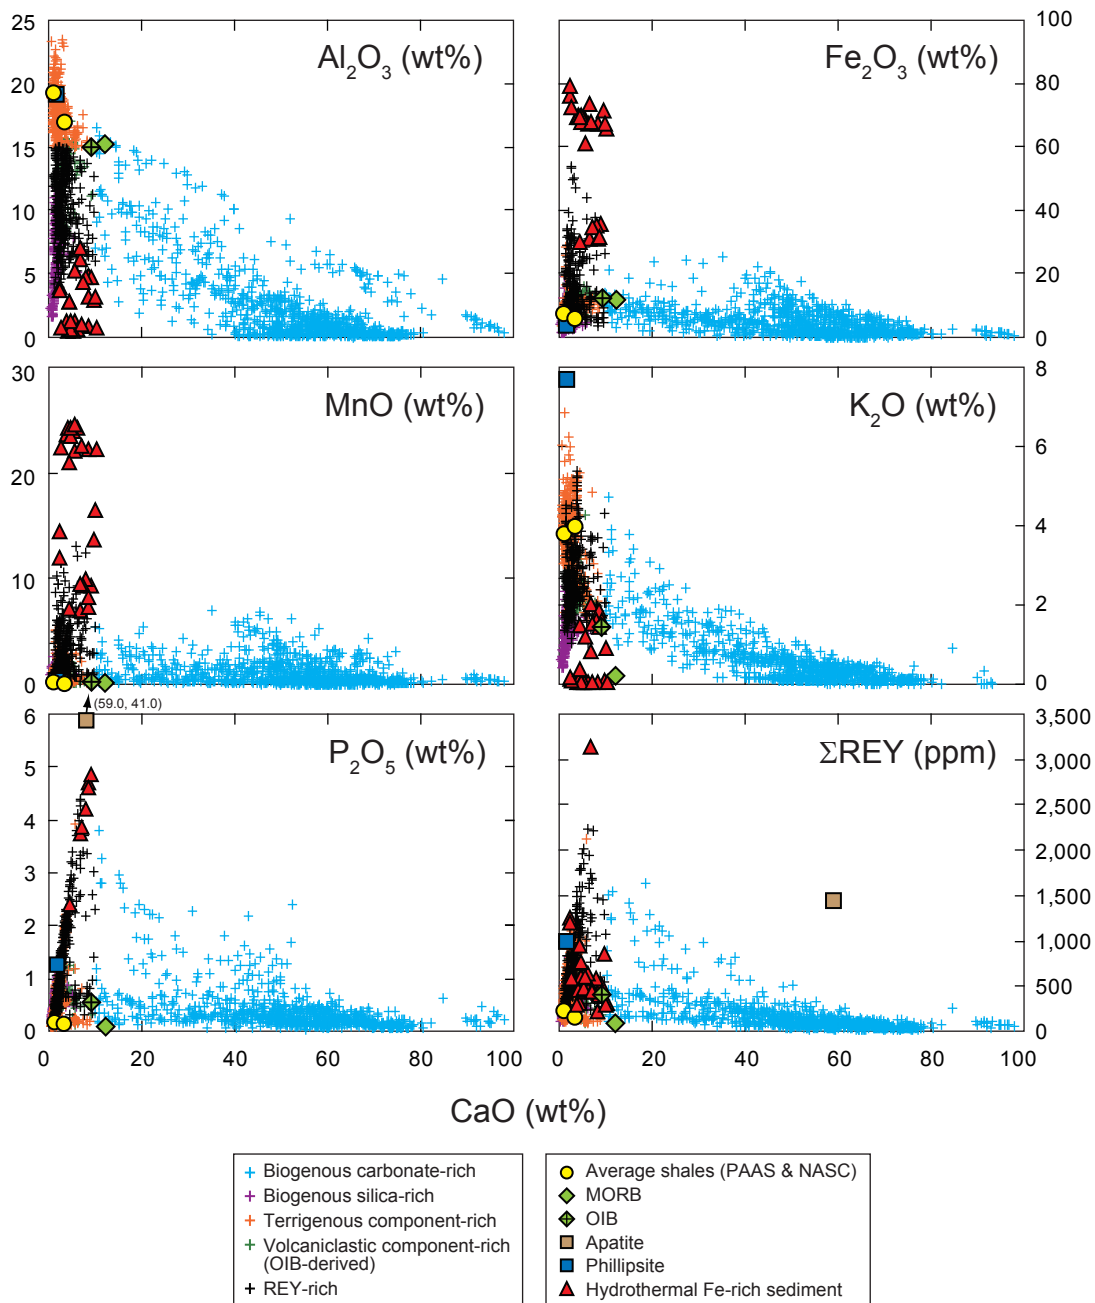

**Supplementary Figure S2. CaO versus other oxides and  $\Sigma$ REY.** To make constituent components of seafloor sediments more visible, sediments with specific compositions are colour-coded: biogenous carbonate-rich ( $\text{CaO} > 10$  wt%) in blue, biogenous silica-rich ( $\text{SiO}_2 > 70$  wt%) in purple, terrigenous component-rich ( $\text{Al}_2\text{O}_3 > 15$  wt%) in orange and volcanoclastic component-rich (OIB-derived;  $\text{TiO}_2 > (\text{Al}_2\text{O}_3 + 5)/20$ ) in green. The remaining samples, as shown in black, can be regarded as enriched in the REY-rich component. Major element oxide data are recalculated on a loss on ignition-free basis. The major element oxide data point of phillipsite is represented by the average content of the data by refs S1 and S2. The  $\Sigma$ REY content of phillipsite is given as 1,000 ppm based on the data by ref. S3. Note that two-third of the samples of hydrothermal Fe-rich sediments lack  $\text{SiO}_2$ ,  $\text{TiO}_2$  and  $\text{P}_2\text{O}_5$  data, and have been recalculated on a carbonate-free basis. Data on endmembers: average shales (refs S4–6), MORB (ref. S7), OIB (ref. S8), apatite (ref. S9), phillipsite (refs S1–3) and hydrothermal Fe-rich sediment near mid-ocean ridge (refs S10–12).

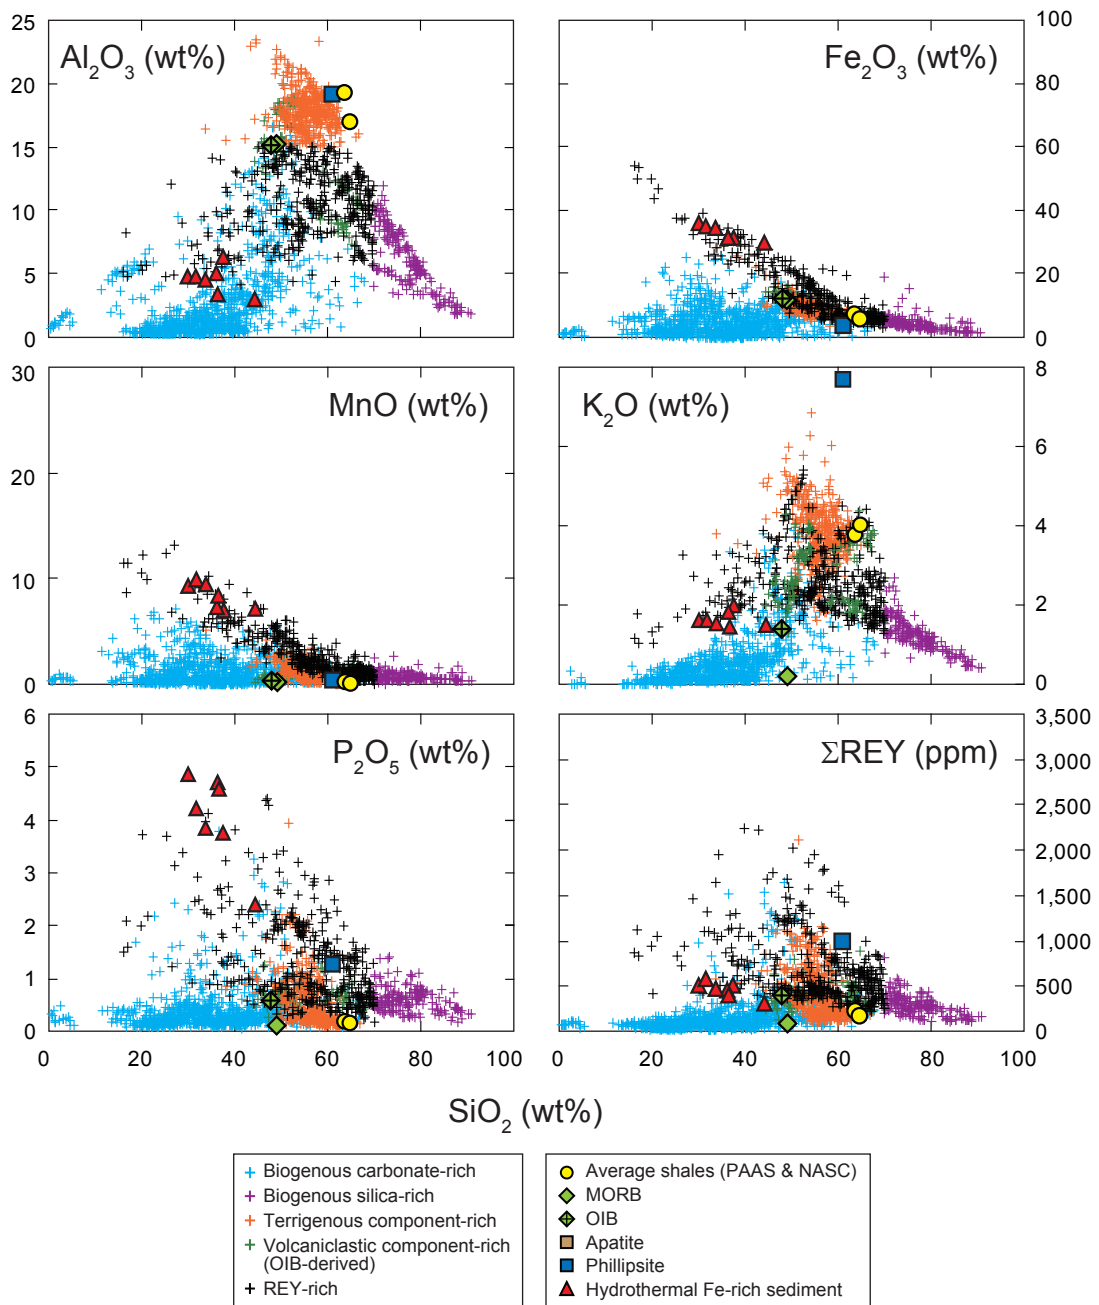

**Supplementary Figure S3.  $\text{SiO}_2$  versus other oxides and  $\Sigma\text{REY}$ .** Symbols and the colour-coding are the same as in Supplementary Fig. S2.



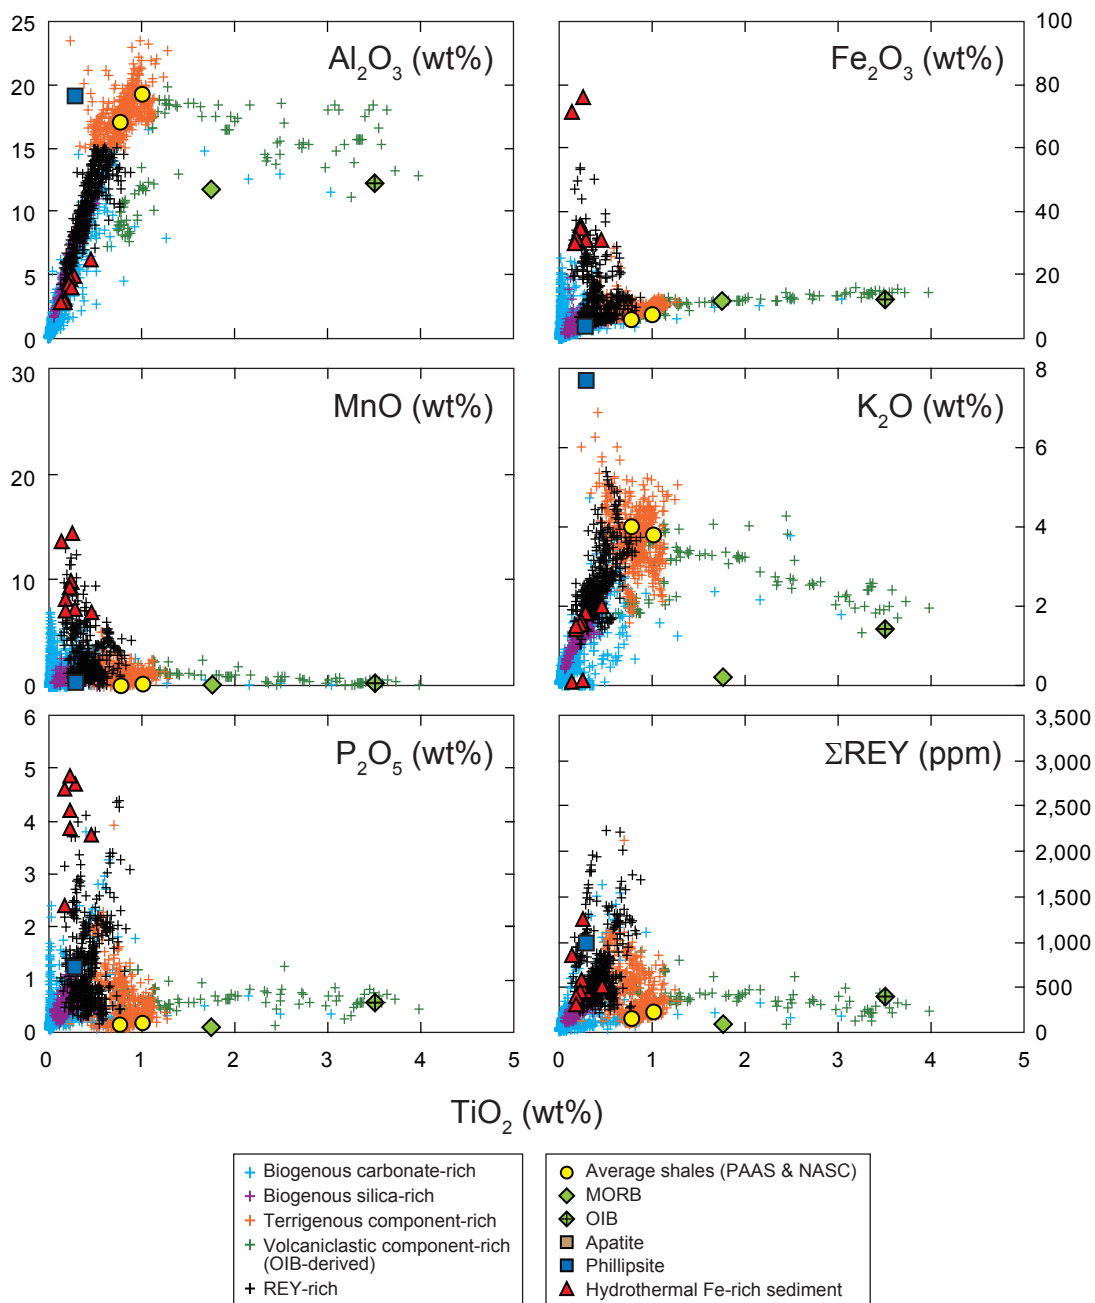

**Supplementary Figure S4.  $\text{TiO}_2$  versus other oxides and  $\Sigma\text{REY}$ .** Symbols and the colour-coding are the same as in Supplementary Fig. S2.

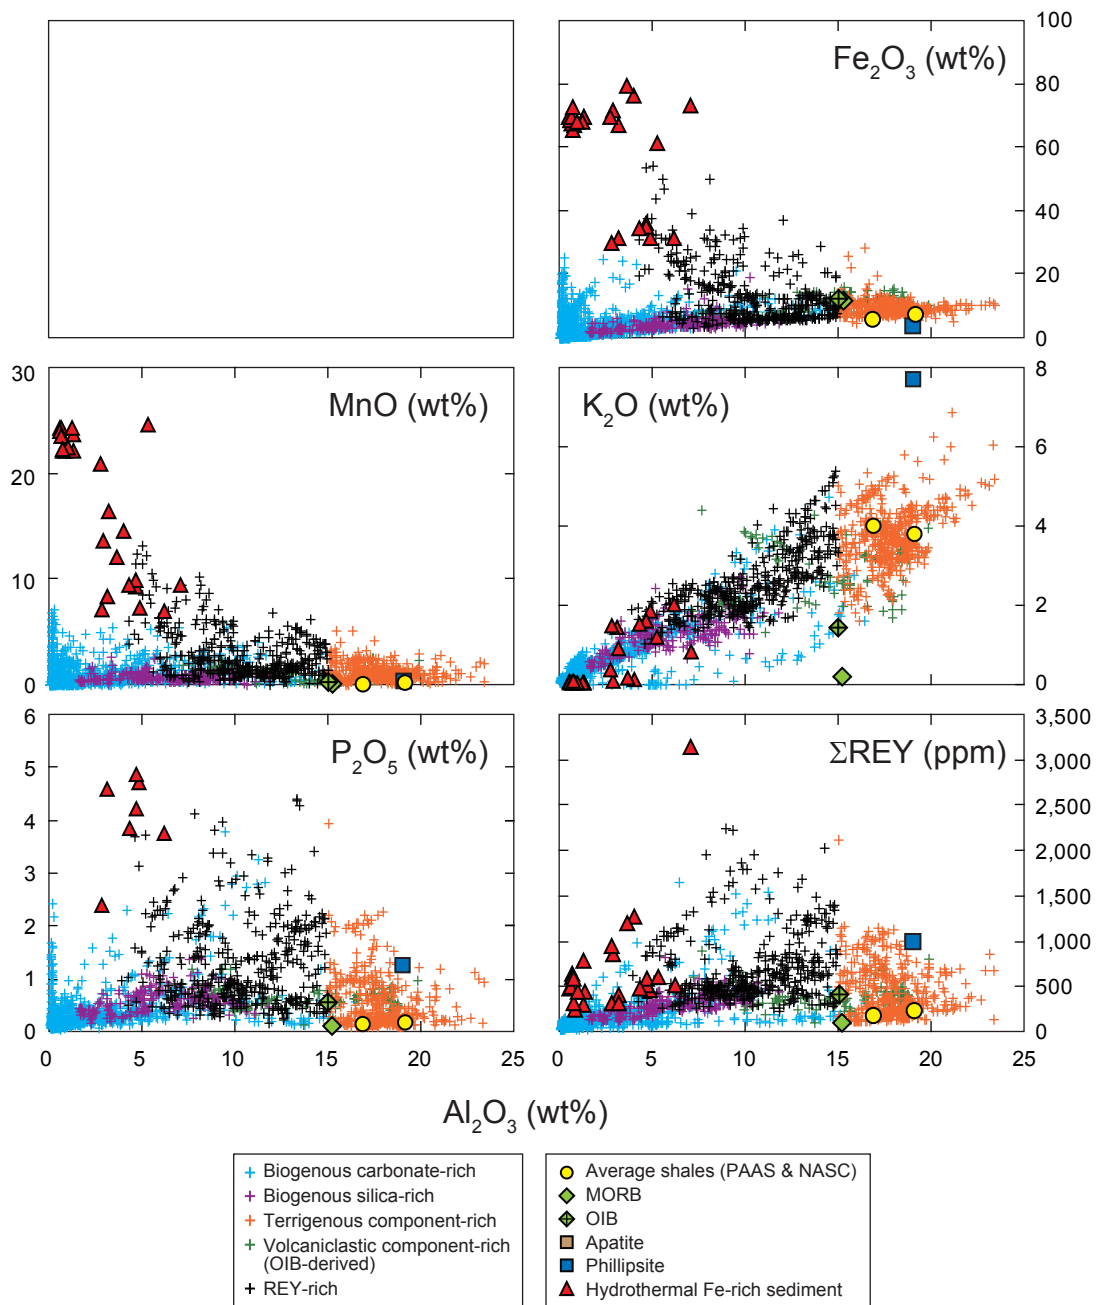

**Supplementary Figure S5.**  $\text{Al}_2\text{O}_3$  versus other oxides and  $\Sigma\text{REY}$ . Symbols and the colour-coding are the same as in Supplementary Fig. S2.

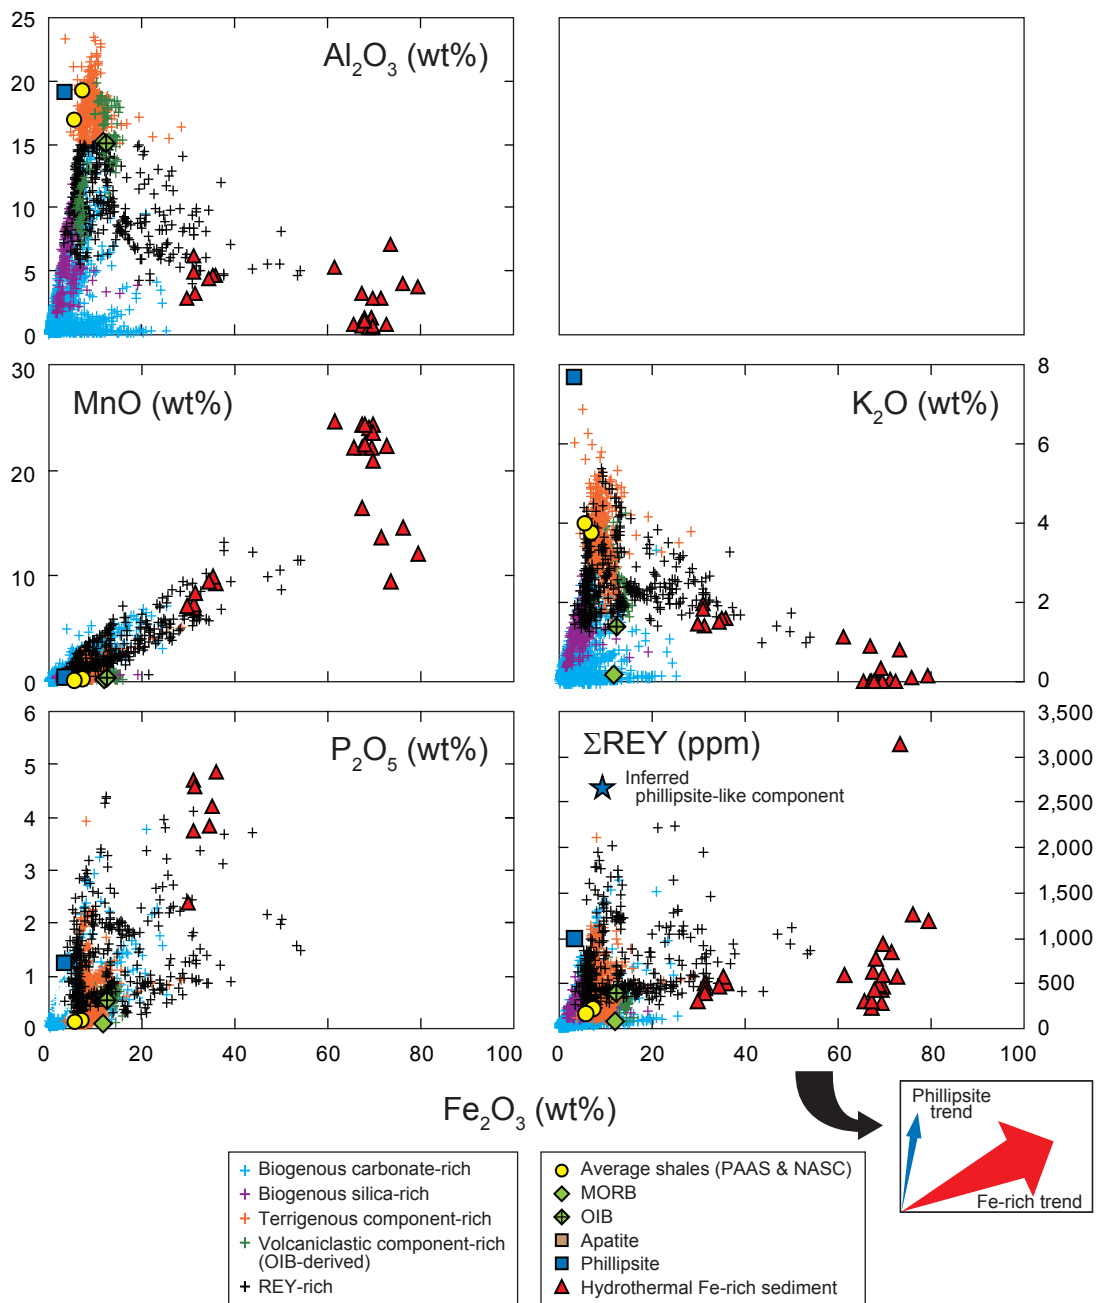

**Supplementary Figure S6.  $\text{Fe}_2\text{O}_3$  versus other oxides and  $\Sigma\text{REY}$ .** Symbols and the colour-coding are the same as in Supplementary Fig. S2.

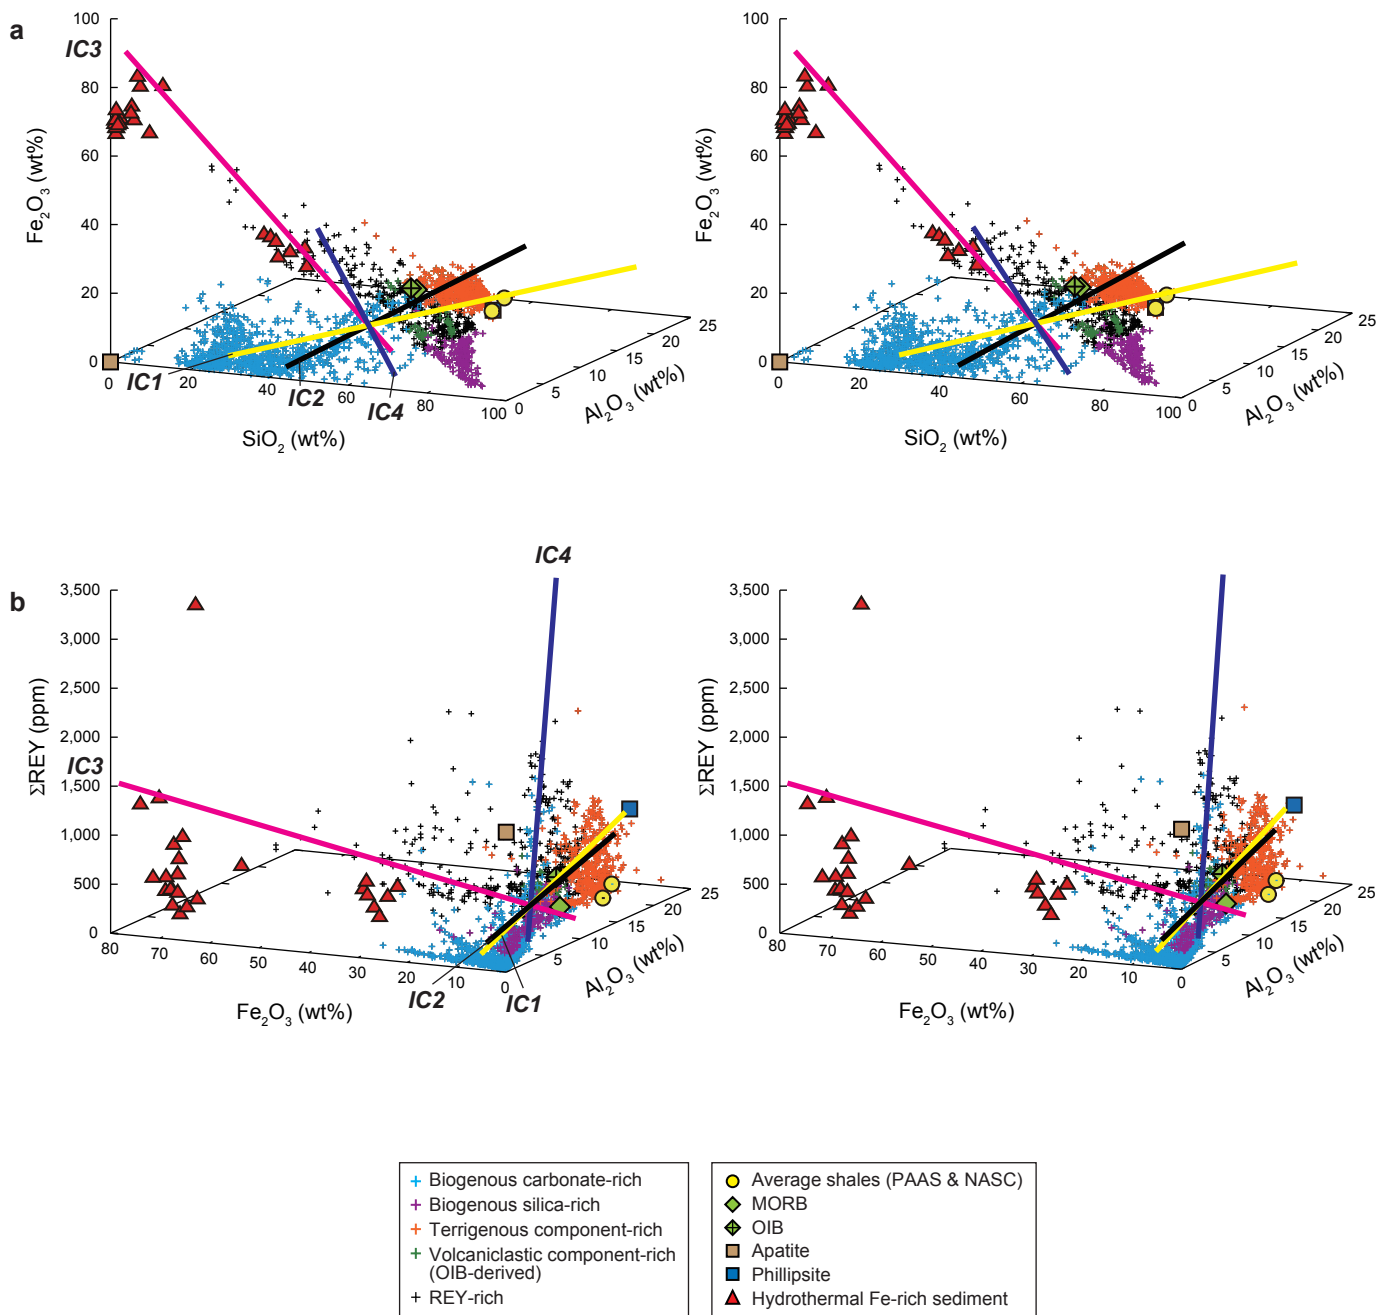

**Supplementary Figure S7. Independent components (IC1 to IC4) in three-dimensional stereo plots. a,  $\text{SiO}_2\text{-Al}_2\text{O}_3\text{-Fe}_2\text{O}_3$ . b,  $\text{Fe}_2\text{O}_3\text{-Al}_2\text{O}_3\text{-}\Sigma\text{REY}$ .** Independent components have been obtained with the same procedure as described in ref. S13. Symbols and the colour-coding are the same as in Supplementary Fig. S2.

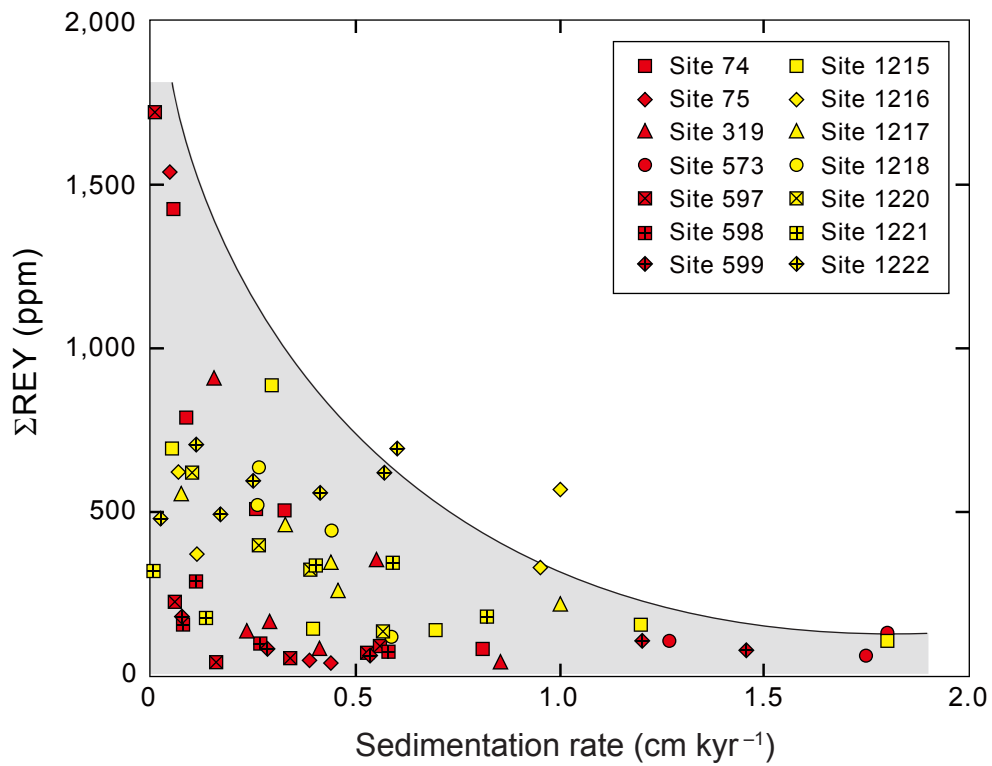

**Supplementary Figure S8. Sedimentation rates versus  $\Sigma$ REY contents for the DSDP/ODP cores.** Data on sedimentation rates are from the respective Initial Reports of the Deep Sea Drilling Project and Proceedings of the Ocean Drilling Program volumes.

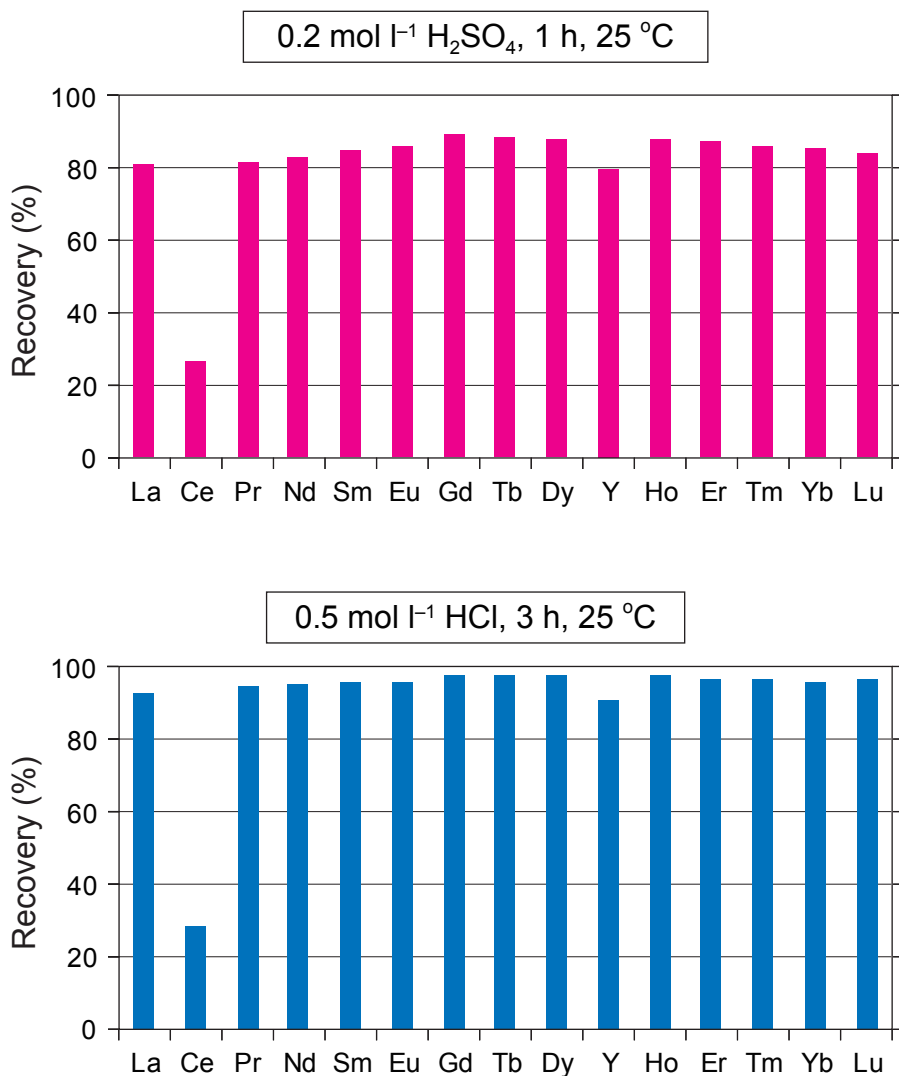

**Supplementary Figure S9. Results of leaching experiments of REY from the REY-rich mud (Sample No. Site 68\*, 1-2, 50-52 cm) by dilute acids.** Experimental conditions are 0.2 mol l<sup>-1</sup> H<sub>2</sub>SO<sub>4</sub>, 1 h and 25°C (above) and 0.5 mol l<sup>-1</sup> HCl, 3 h and 25°C (below).

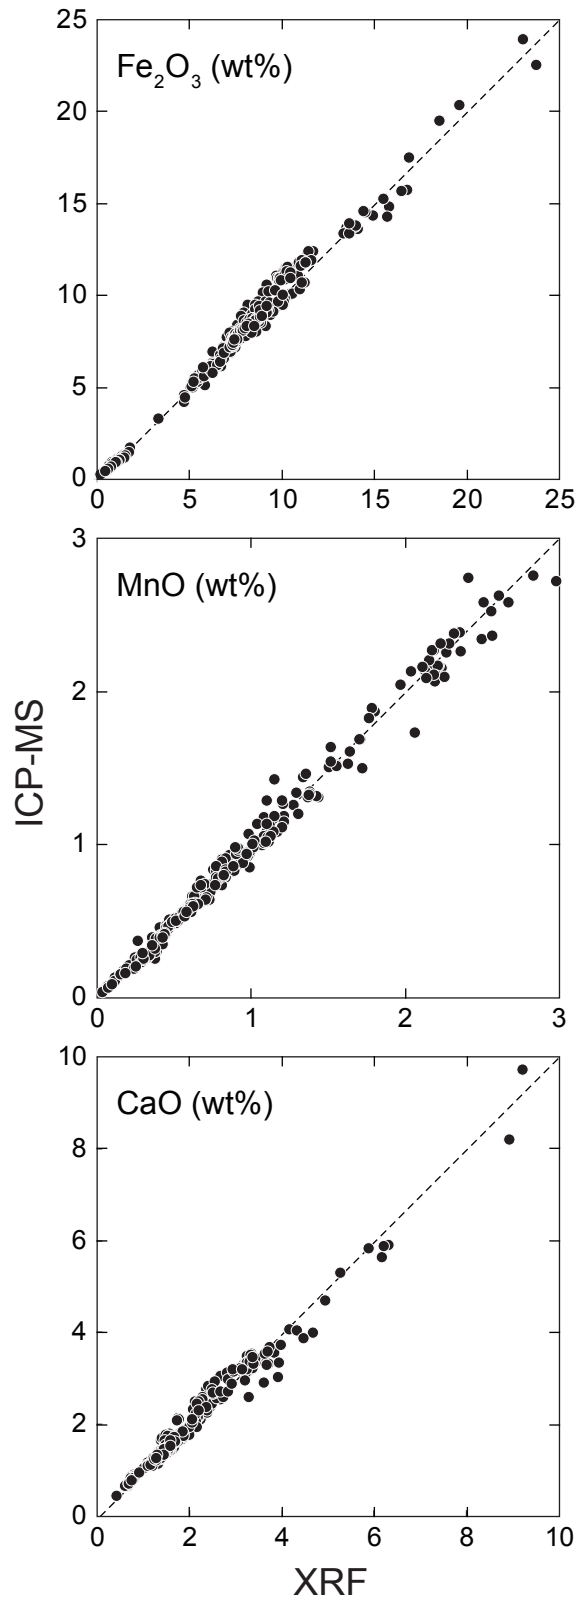

Supplementary Figure S10. Comparison of major element data obtained by two analytical methods (XRF and ICP-MS) for the piston core samples.

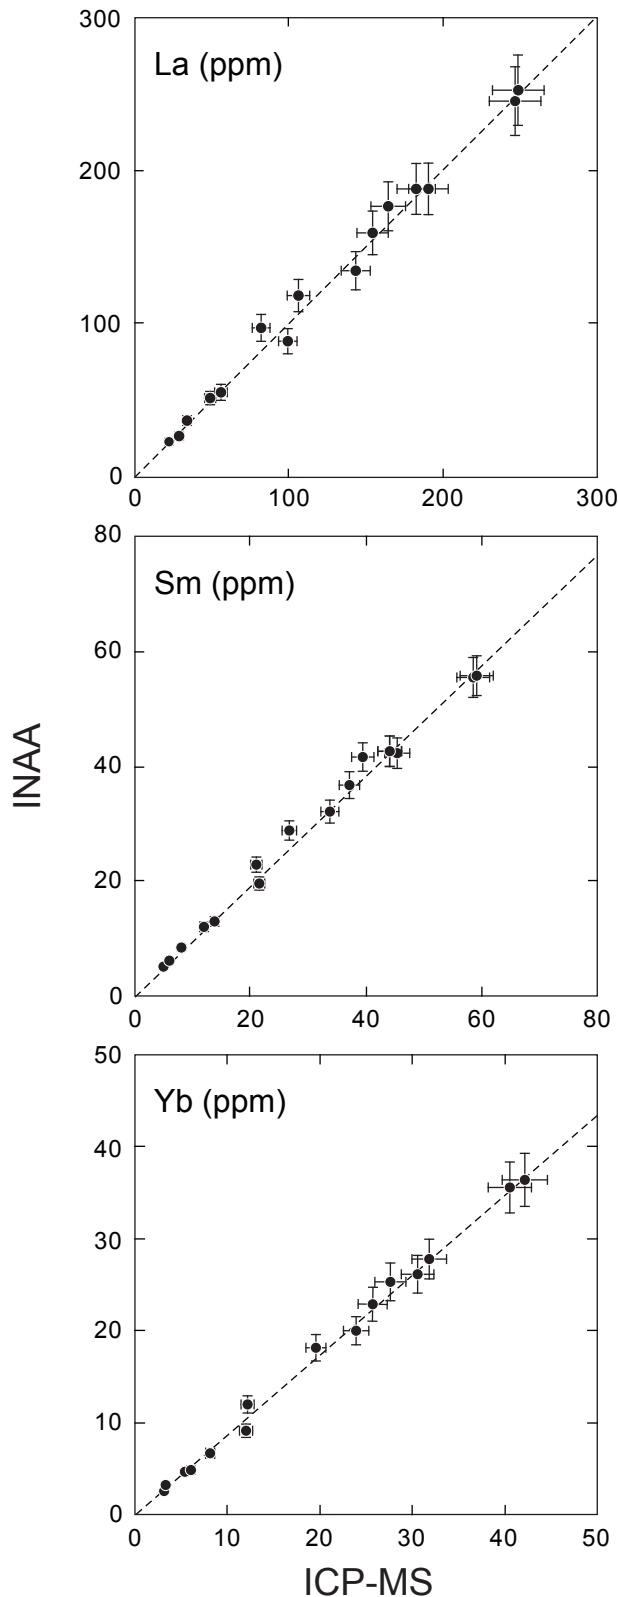

**Supplementary Figure S11. Comparison of La, Sm and Yb data of selected core samples from Site 76 determined by the present ICP-MS analysis with INAA performed by Actlabs (Ontario, Canada).** Error bars and dashed lines represent analytical uncertainties and regression lines, respectively. Our data agree well with the Actlabs data within the analytical uncertainties which integrate those for ICP-MS (<7 %) and INAA (<9 %), i.e., total <16 %. In these numerical values, uncertainties arising from 95 % confidence interval in the certified values of standard materials are included, and may produce a well-defined linear correlation with a systematic but minor deviation from the 1:1 trend (e.g., Yb). All the estimates concerning the potential storage in the main text are referred to considering the integrated uncertainties (e.g.,  $\Sigma\text{REY}$  of  $1,180 \pm 189$  ppm for Site 76).



**Supplementary Table S1. DSDP/ODP and piston core lists used in this study.**

**(a) DSDP/ODP**

| Site | Hole | Latitude   | Longitude   | Water depth (m) | Area                       | Length of study core (m) |
|------|------|------------|-------------|-----------------|----------------------------|--------------------------|
| 33   | *    | 39°28.48'N | 127°29.81'W | 4,284           | northeast Pacific          | 55.8                     |
| 36   | *    | 40°59.08'N | 130°06.58'W | 3,273           | northeast Pacific          | 75.2                     |
| 37   | *    | 40°58.74'N | 140°43.11'W | 4,682           | northeast Pacific          | 28.8                     |
| 38   | *    | 38°42.12'N | 140°21.27'W | 5,134           | northeast Pacific          | 47.5                     |
| 39   | *    | 32°48.28'N | 139°34.29'W | 4,929           | northeast Pacific          | 16.3                     |
| 46   | *    | 27°53'N    | 171°26.30'E | 5,769           | north central Pacific      | 6.35                     |
| 65   | *    | 04°21.21'N | 176°59.16'E | 6,130           | central Pacific            | 73.0                     |
| 68   | *    | 16°43.32'N | 164°10.36'W | 5,467           | central Pacific            | 16.4                     |
| 71   | *    | 04°28.28'N | 140°18.91'W | 4,419           | central equatorial Pacific | 68.5                     |
| 74   | *    | 06°14.20'S | 136°05.80'W | 4,431           | southeast Pacific          | 36.3                     |
| 75   | *    | 12°31'S    | 134°16'W    | 4,181           | southeast Pacific          | 79.5                     |
| 76   | *, A | 14°05.90'S | 145°39.64'W | 4,598           | southeast Pacific          | 27.1                     |
| 83   | *    | 04°02.80'N | 95°44.25'W  | 3,646           | eastern equatorial Pacific | 18.4                     |
| 160  | *    | 11°42.27'N | 130°52.81'W | 4,940           | central tropical Pacific   | 79.0                     |
| 162  | *    | 14°52.19'N | 140°02.61'W | 4,854           | central tropical Pacific   | 36.0                     |
| 163  | *    | 11°14.66'N | 150°17.52'W | 5,230           | central tropical Pacific   | 79.0                     |
| 164  | *    | 13°12.14'N | 161°30.98'W | 5,499           | central Pacific            | 78.9                     |
| 166  | *    | 03°45.70'N | 175°04.80'W | 4,962           | central Pacific            | 74.0                     |
| 168  | *    | 10°42.20'N | 173°35.90'E | 5,420           | central Pacific            | 57.1                     |
| 170  | *    | 11°48'N    | 177°37'E    | 5,792           | central Pacific            | 9.91                     |
| 172  | *    | 31°32.23'N | 133°22.36'W | 4,767           | northeast Pacific          | 22.7                     |
| 199  | *    | 13°30.80'N | 156°10.30'E | 6,090           | western Pacific            | 80.0                     |
| 288  | *    | 05°58.35'S | 161°49.53'E | 3,000           | southwest Pacific          | 72.5                     |
| 311  | *    | 28°07.46'N | 179°44.25'E | 5,775           | north central Pacific      | 20.4                     |
| 313  | *    | 20°10.52'N | 170°57.15'W | 3,484           | central Pacific            | 78.5                     |
| 316  | *    | 00°05.44'N | 157°07.71'W | 4,451           | central Pacific            | 8.81                     |
| 317  | B    | 11°00.09'S | 162°15.78'W | 2,598           | central Pacific            | 70.0                     |
| 319  | *    | 13°01.04'S | 101°31.46'W | 4,296           | southeast Pacific          | 55.8                     |
| 463  | *    | 21°21.01'N | 174°40.07'E | 2,525           | north central Pacific      | 55.5                     |
| 571  | *    | 03°59.84'N | 114°08.53'W | 3,962           | eastern equatorial Pacific | 6.31                     |
| 573  | *, A | 00°29.91'N | 133°18.57'W | 4,301           | central equatorial Pacific | 57.4                     |
| 596  | *    | 23°51.20'S | 165°39.27'W | 5,701           | southwest Pacific          | 48.9                     |
| 597  | A    | 18°48.43'S | 129°46.22'W | 4,163           | southeast Pacific          | 50.0                     |
| 598  | *    | 19°00.28'S | 124°40.61'W | 3,699           | southeast Pacific          | 43.1                     |
| 599  | *    | 19°27.09'S | 119°52.88'W | 3,654           | southeast Pacific          | 35.0                     |
| 600  | C    | 18°55.70'S | 116°50.45'W | 3,398           | southeast Pacific          | 11.7                     |
| 601  | *    | 18°55.22'S | 116°52.11'W | 3,433           | southeast Pacific          | 20.0                     |
| 602  | B    | 18°54.41'S | 116°54.68'W | 3,535           | southeast Pacific          | 3.85                     |
| 807  | A    | 03°36.42'N | 156°37.49'E | 2,804           | western equatorial Pacific | 73.6                     |
| 834  | A    | 18°34.06'S | 177°51.74'W | 2,692           | southwest Pacific          | 42.6                     |
| 851  | B    | 02°46.22'N | 110°34.31'W | 3,760           | eastern equatorial Pacific | 26.8                     |
| 853  | B    | 07°12.66'N | 109°45.08'W | 3,716           | eastern equatorial Pacific | 76.1                     |
| 854  | C    | 11°13.43'N | 109°35.65'W | 3,568           | eastern equatorial Pacific | 52.5                     |
| 869  | A    | 11°00.09'N | 164°44.97'E | 4,827           | western Pacific            | 73.0                     |
| 1215 | A    | 26°01.77'N | 147°55.99'W | 5,396           | central tropical Pacific   | 69.0                     |
| 1216 | A    | 21°27.16'N | 139°28.79'W | 5,153           | central tropical Pacific   | 54.6                     |
| 1217 | A    | 16°52.01'N | 138°06'W    | 5,342           | central tropical Pacific   | 75.6                     |
| 1218 | A    | 08°53.37'N | 135°22'W    | 4,826           | central tropical Pacific   | 65.6                     |
| 1220 | A    | 10°10.60'N | 142°45.49'W | 5,218           | central tropical Pacific   | 67.5                     |
| 1221 | A    | 12°02'N    | 143°41.65'W | 5,175           | central tropical Pacific   | 38.1                     |
| 1222 | A    | 13°48.98'N | 143°53.35'W | 4,989           | central tropical Pacific   | 72.4                     |

**Supplementary Table S1. (continued.)****(b) Piston core**

| <b>Cruise</b> | <b>Station No.</b> | <b>Latitude</b> | <b>Longitude</b> | <b>Water depth (m)</b> | <b>Area</b>                | <b>Length of study core (m)</b> |
|---------------|--------------------|-----------------|------------------|------------------------|----------------------------|---------------------------------|
| KH68-4        | 15-3               | 12°00'N         | 169°58.5'W       | 5,050                  | central Pacific            | 9.88                            |
| KH68-4        | 18-3               | 01°59.5'N       | 170°00.5'W       | 5,470                  | central Pacific            | 9.03                            |
| KH68-4        | 20-2               | 02°28.4'S       | 169°59.7'W       | 5,130                  | central Pacific            | 9.90                            |
| KH68-4        | 25-2               | 19°59.1'S       | 170°01.6'W       | 5,300                  | southwest Pacific          | 7.15                            |
| KH68-4        | 29-2               | 25°54.4'S       | 170°19.5'W       | 5,600                  | southwest Pacific          | 9.17                            |
| KH68-4        | 31-3               | 32°09.2'S       | 169°56.3'W       | 5,650                  | southwest Pacific          | 7.03                            |
| KH68-4        | 39-2               | 50°07.2'S       | 169°58.9'W       | 5,190                  | southwest Pacific          | 4.93                            |
| KH70-2        | 5-3                | 38°25.5'N       | 170°05.7'W       | 5,245                  | north central Pacific      | 10.6                            |
| KH70-2        | 7-3                | 33°01.9'N       | 169°53.5'W       | 5,420                  | north central Pacific      | 11.5                            |
| KH70-2        | 9-3                | 17°05'N         | 146°12.3'W       | 4,950                  | central tropical Pacific   | 4.19                            |
| KH71-5        | 7-2                | 02°00.8'N       | 145°59'W         | 4,550                  | central equatorial Pacific | 10.0                            |
| KH71-5        | 10-2               | 04°58.5'S       | 146°03.5'W       | 4,960                  | southeast Pacific          | 2.02                            |
| KH71-5        | 12-3               | 11°01.4'S       | 146°01.5'W       | 4,830                  | southeast Pacific          | 2.95                            |
| KH71-5        | 15-2               | 20°23'S         | 148°02'W         | 4,615                  | southeast Pacific          | 0.72                            |
| KH71-5        | 42-2               | 27°34.8'S       | 88°03'W          | 3,690                  | southeast Pacific          | 4.60                            |
| KH71-5        | 44                 | 21°S            | 93°W             | —                      | southeast Pacific          | 3.87                            |
| KH71-5        | 53-2               | 08°15.3'N       | 112°42.1'W       | 3,380                  | eastern equatorial Pacific | 5.27                            |
| KH72-2        | 56                 | 21°34'N         | 132°42'E         | 5,360                  | Philippine Sea             | 7.50                            |
| KH72-2        | 58                 | 22°53'N         | 129°13'E         | 5,300                  | Philippine Sea             | 7.51                            |
| KH73-4        | 5                  | 12°23.2'N       | 151°48'E         | 5,920                  | western Pacific            | 11.5                            |
| KH73-4        | 9                  | 07°49.9'S       | 172°48.6'E       | 5,390                  | central Pacific            | 10.3                            |
| KH76-2        | 3                  | 24°27.2'N       | 132°35.4'E       | 4,750                  | Philippine Sea             | 6.97                            |
| KH80-3        | 22                 | 31°16.2'N       | 153°42.9'E       | 5,750                  | western Pacific            | 10.5                            |
| KH80-3        | 30                 | 09°50.6'N       | 153°13.5'E       | 5,480                  | western Pacific            | 10.0                            |
| KH84-1        | 17A                | 20°05.1'N       | 143°35'E         | 4,140                  | Philippine Sea             | 9.51                            |
| KH84-1        | 21                 | 27°55.1'N       | 142°22.3'E       | 3,500                  | Philippine Sea             | 9.01                            |
| KH84-1        | 30                 | 27°13.3'N       | 149°06.7'E       | 5,800                  | western Pacific            | 7.01                            |

**Supplementary Table S2. Total thickness and average  $\Sigma$ REY content of REY-rich mud in the two high-potential regions.**

**(a) the eastern South Pacific region**

| Site    | Water depth (m) | Total thickness of REY-rich mud (m) | Average $\Sigma$ REY content (ppm) |
|---------|-----------------|-------------------------------------|------------------------------------|
| 74      | 4,431           | 18.5                                | 880                                |
| 75      | 4,181           | 2.3                                 | 1,526                              |
| 76      | 4,598           | 9.6                                 | 1,178                              |
| 597     | 4,163           | 1.6                                 | 1,628                              |
| average | 4,343           | 8.0                                 | 1,054*                             |
| range   | 4,163–4,598     | 1.6–18.5                            | 880–1,628                          |

**(b) the central North Pacific region**

| Site    | Water depth (m) | Total thickness of REY-rich mud (m) | Average $\Sigma$ REY content (ppm) |
|---------|-----------------|-------------------------------------|------------------------------------|
| 65      | 6,130           | 16.8                                | 451                                |
| 68      | 5,467           | 16.4                                | 886                                |
| 160     | 4,940           | 17.4                                | 488                                |
| 162     | 4,854           | 4.4                                 | 495                                |
| 163     | 5,230           | 23.4                                | 660                                |
| 164     | 5,499           | 29.8                                | 720                                |
| 166     | 4,962           | 8.6                                 | 506                                |
| 168     | 5,420           | 7.1                                 | 680                                |
| 170     | 5,792           | 9.9                                 | 1,002                              |
| 313     | 3,484           | 5.7                                 | 727                                |
| 1215    | 5,396           | 25.6                                | 759                                |
| 1216    | 5,153           | 43.7                                | 603                                |
| 1217    | 5,342           | 43.6                                | 525                                |
| 1218    | 4,826           | 37.8                                | 569                                |
| 1220    | 5,218           | 33.8                                | 570                                |
| 1221    | 5,175           | 6.4                                 | 472                                |
| 1222    | 4,989           | 70.3                                | 641                                |
| average | 5,169           | 23.6                                | 625*                               |
| range   | 3,484–6,130     | 4.4–70.3                            | 451–1,002                          |

\* Note that the average  $\Sigma$ REY contents of the two high-potential regions are weighted averages.

## Supplementary References

- S1. Dubinin, A. V. Geochemistry of rare earth elements in oceanic phillipsites. *Lithology Mineral Res.* **35**, 101-108 (2000).
- S2. Sheppard, R. A., Gude, A. J., III & Griffin, J. J. Chemical composition and physical properties of phillipsite from the Pacific and Indian Oceans. *Am. Mineral.* **55**, 2053-2062 (1970).
- S3. Piper, D. Z. Rare earth elements in ferromanganese nodules and other marine phases. *Geochim. Cosmochim. Acta* **38**, 1007-1022 (1974).
- S4. Taylor, S. R. & McLennan, S. M. *The Continental Crust: Its Composition and Evolution* (Blackwell, 1985).
- S5. Gromet, L. P., Dymek, R. F., Haskin, L. A. & Korotev, R. L. The "North American shale composite": Its compilation, major and trace element characteristics. *Geochim. Cosmochim. Acta* **48**, 2469-2482 (1984).
- S6. Goldstein, S. J. & Jacobsen, S. B. Rare earth elements in river waters. *Earth Planet. Sci. Lett.* **89**, 35-47 (1988).
- S7. Floyd, P. A. & Castillo, P. R. Geochemistry and petrogenesis of Jurassic ocean crust basalts, Site 801. *Proc. ODP Sci. Results* Vol. 129, 361-388 (Ocean Drilling Program, 1992)
- S8. Christie, D. M., Dieu, J. J. & Gee, J. S. Petrologic studies of basement lavas from northwest Pacific guyots. *Proc. ODP Sci. Results* Vol. 144, 495-512 (Ocean Drilling Program, 1995)
- S9. Lécuyer, C., Reynard, B. & Grandjean, P. Rare earth element evolution of Phanerozoic seawater recorded in biogenic apatites. *Chem. Geol.* **204**, 63-102 (2004).
- S10. Jarvis, I. Geochemistry and origin of Eocene-Oligocene metalliferous sediments from the central equatorial Pacific: Deep Sea Drilling Project sites 573 and 574. *DSDP Init. Repts.* Vol. 85, 781-804 (US Government Printing Office, 1985).
- S11. Barrett, T. J., Taylor, P. N. & Lugowski, J. Metalliferous sediments from DSDP Leg 92: The East Pacific Rise transect. *Geochim. Cosmochim. Acta* **51**, 2241-2253 (1987).

- S12. Barrett, T. J. & Jarvis, I. Rare-earth element geochemistry of metalliferous sediments from DSDP Leg 92: The East Pacific Rise transect. *Chem. Geol.* **67**, 243-259 (1988).
- S13. Iwamori, H., Albarède, F. & Nakamura, H. Global structure of mantle isotopic heterogeneity and its implications for mantle differentiation and convection. *Earth Planet. Sci. Lett.* **299**, 339-351 (2010).
